# Supplementary material
Source: PubMed Central journal article supplement (PMC3911076)
Supplement: AEM.03313-13_zam999105061so1.pdf [file AEM.03313-13_zam999105061so1.pdf]

a)

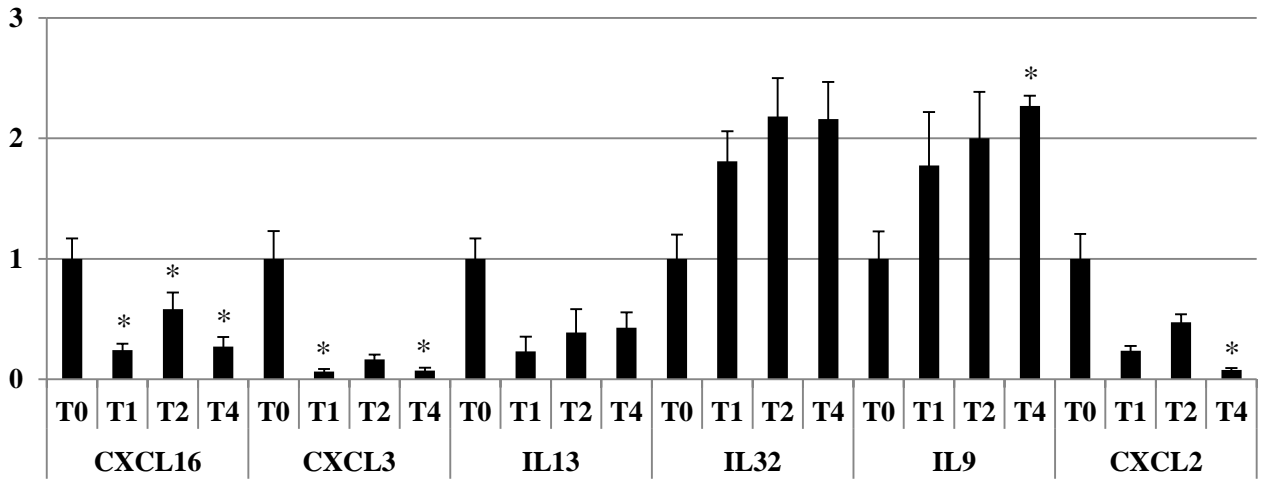

b)

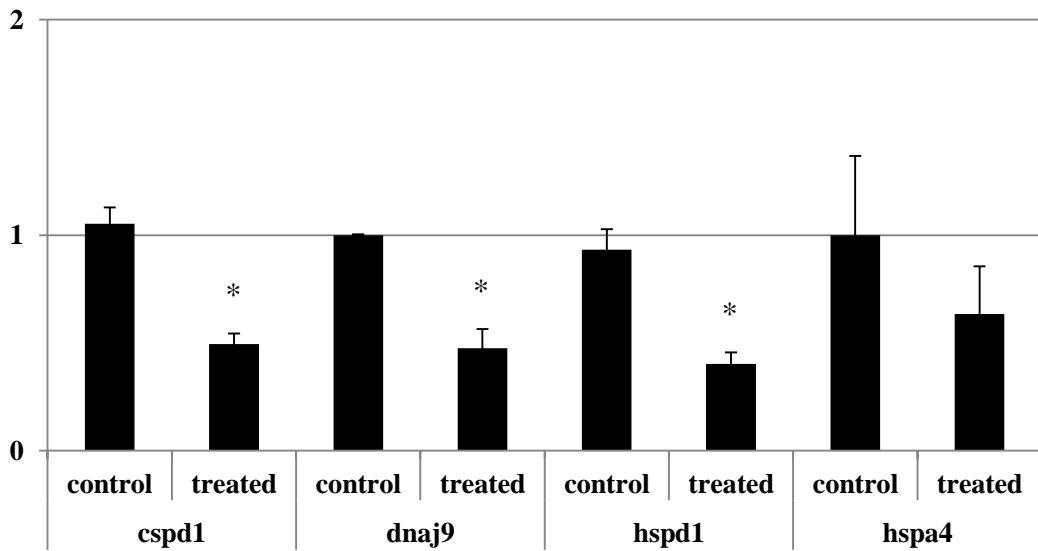

**Figure S1.** The relative transcription level of six human genes (panel a) and five mouse genes (panel b) detected by qRT-PCR. The histograms indicate the relative amounts of mRNAs for the specific samples, i.e., different time points of contact of PRL2010 cells with HT29 cells (panel a) or colonized and not colonized mice (panel b). Asterisk indicates a  $p$ -value  $< 0.01$ .

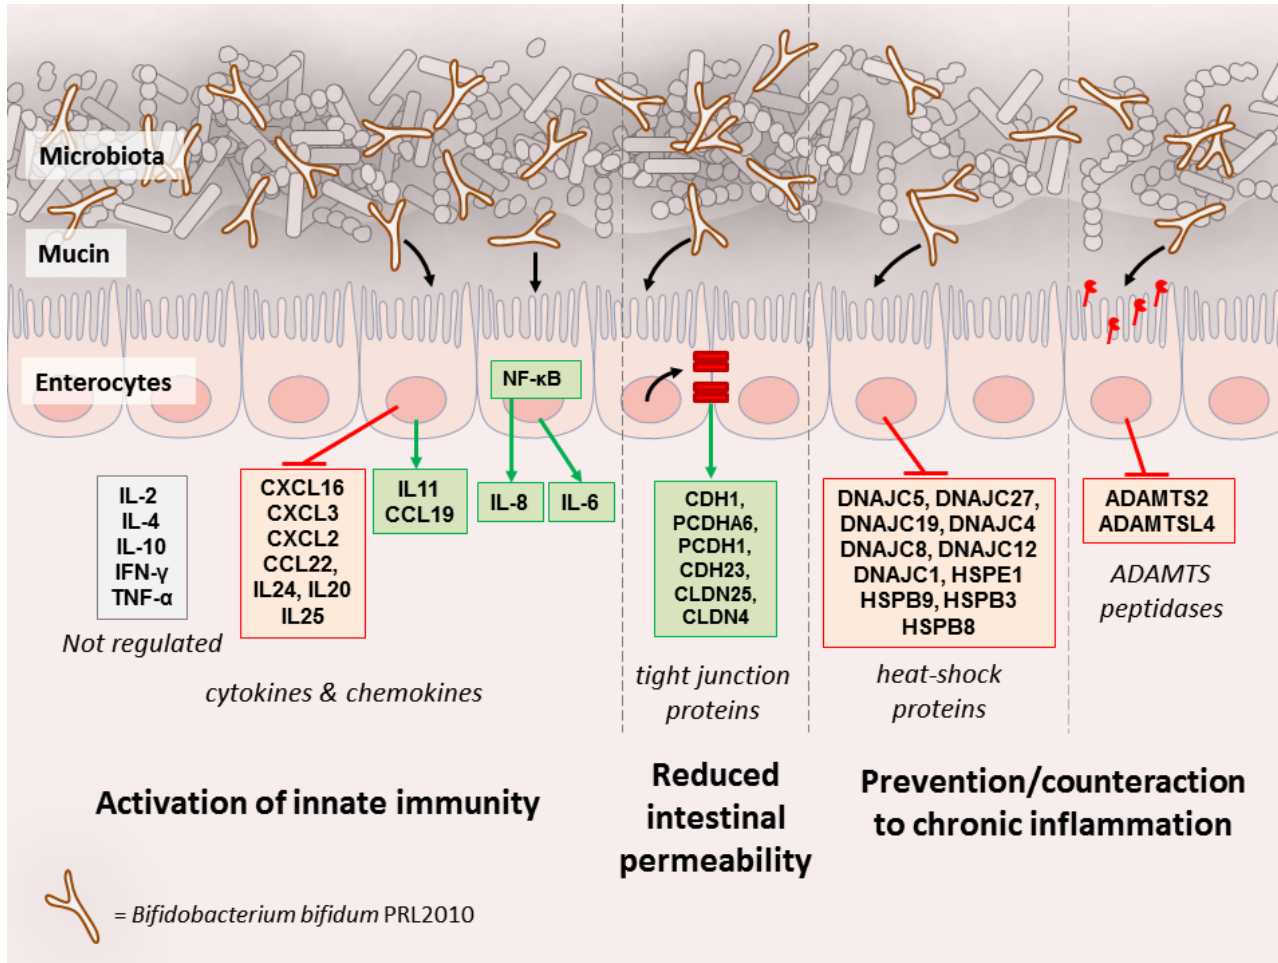

**Figure S2.** Possible physiological effects induced by *Bifidobacterium bifidum* PRL2010 through the direct interaction with the intestinal mucosa. The specific significance of genes is described in the text. Genes that have been inhibited are indicated in a red rectangle, whereas those that have been enhanced are in a green rectangle.
